# Supplementary material for: Trehalose-Induced Remodelling of the Human Microbiota Affects Clostridioides difficile Infection Outcome in an In Vitro Colonic Model: A Pilot Study
Source: PubMed Central journal article supplement (PMC8284250; doi:10.3389/fcimb.2021.670935), 2021-07-02
Supplement: DataSheet_1.pdf [file DataSheet_1.pdf]

Supplementary material

Trehalose-induced remodelling of the human microbiota affects  
*Clostridioides difficile* infection outcome in an *in vitro* colonic model:  
a pilot study

**Supplementary Table 1.** Comparison of bacterial families from the donors and the faecal slurry

| Bacterial family           | Abundance (%) |         |         |         |         |         |
|----------------------------|---------------|---------|---------|---------|---------|---------|
|                            | Slurry        | Donor A | Donor B | Donor C | Donor D | Donor E |
| Methanobacteriaceae        | 0.042         | 0.041   | 0.035   | 0.111   | 0.003   | 0.000   |
| Actinomycetaceae           | 0.006         | 0.000   | 0.001   | 0.017   | 0.000   | 0.007   |
| Bifidobacteriaceae         | 6.525         | 5.504   | 5.701   | 4.932   | 0.024   | 15.795  |
| Coriobacteriaceae          | 1.387         | 1.744   | 1.527   | 0.292   | 0.041   | 3.713   |
| Bacteroidales              | 7.509         | 11.808  | 11.848  | 0.000   | 0.000   | 0.001   |
| Barnesiellaceae            | 0.050         | 0.037   | 0.035   | 0.031   | 0.000   | 0.098   |
| Odoribacteraceae           | 0.033         | 0.009   | 0.012   | 0.099   | 0.000   | 0.057   |
| Paraprevotellaceae         | 0.955         | 1.531   | 1.283   | 0.000   | 0.000   | 0.000   |
| Bacteroidaceae             | 12.905        | 7.875   | 8.530   | 12.540  | 20.431  | 13.921  |
| Porphyromonadaceae         | 0.660         | 0.423   | 0.471   | 0.664   | 0.050   | 1.653   |
| Prevotellaceae             | 0.693         | 1.105   | 0.953   | 0.000   | 0.000   | 0.000   |
| Rikenellaceae              | 1.689         | 2.437   | 1.939   | 5.256   | 0.473   | 0.205   |
| Muribaculaceae             | 0.006         | 0.000   | 0.000   | 0.144   | 0.000   | 0.000   |
| Lactobacillaceae           | 1.510         | 0.003   | 0.004   | 0.003   | 9.777   | 0.000   |
| Streptococcaceae           | 0.108         | 0.067   | 0.075   | 0.274   | 0.067   | 0.204   |
| Turicibacteraceae          | 0.152         | 0.170   | 0.202   | 0.074   | 0.000   | 0.001   |
| Clostridiales              | 10.576        | 13.343  | 14.081  | 18.764  | 6.648   | 11.586  |
| Christensenellaceae        | 0.942         | 1.379   | 1.459   | 2.986   | 0.000   | 0.001   |
| Clostridiaceae             | 3.998         | 4.984   | 4.872   | 4.056   | 0.338   | 0.912   |
| Eubacteriaceae             | 0.012         | 0.000   | 0.000   | 0.086   | 0.000   | 0.000   |
| Lachnospiraceae            | 13.547        | 10.156  | 10.459  | 1.789   | 20.529  | 18.324  |
| Peptococcaceae             | 0.265         | 0.487   | 0.508   | 0.000   | 0.000   | 0.000   |
| Peptostreptococcaceae      | 0.037         | 0.049   | 0.032   | 0.048   | 0.000   | 0.001   |
| Ruminococcaceae            | 23.302        | 29.027  | 27.642  | 24.854  | 17.570  | 26.237  |
| Veillonellaceae            | 2.158         | 2.847   | 2.822   | 0.888   | 2.216   | 1.655   |
| Erysipelotrichaceae        | 1.422         | 1.251   | 1.392   | 0.331   | 1.850   | 2.492   |
| Victivallaceae             | 0.443         | 1.002   | 1.344   | 0.000   | 0.000   | 0.001   |
| Unknown Family - RF32      | 0.482         | 0.720   | 0.523   | 3.605   | 0.373   | 0.027   |
| Alcaligenaceae             | 0.912         | 0.597   | 0.631   | 0.703   | 1.100   | 2.532   |
| Desulfovibrionaceae        | 0.370         | 0.669   | 0.749   | 0.096   | 0.024   | 0.445   |
| Enterobacteriaceae         | 4.729         | 0.039   | 0.068   | 0.309   | 16.911  | 0.041   |
| Pasteurellaceae            | 0.017         | 0.061   | 0.065   | 0.115   | 0.001   | 0.032   |
| Anaeroplasmataceae         | 0.161         | 0.396   | 0.520   | 0.000   | 0.000   | 0.000   |
| Unknown Family - RF39      | 0.012         | 0.020   | 0.018   | 0.000   | 0.000   | 0.000   |
| Unknown Family - ML615J-28 | 0.105         | 0.000   | 0.000   | 3.686   | 0.000   | 0.006   |
| Verrucomicrobiaceae        | 2.283         | 0.220   | 0.200   | 13.247  | 1.574   | 0.051   |

## Supplementary material

**Supplementary Table 2.** Glucose and trehalose concentrations from model G (glucose supplemented), model T (trehalose supplemented), and model S (saline supplemented) (vessels 1-3 for each model). File name: Supplemental Table 2 sugar concentrations.

**Supplementary Table 3.** Day 38 KEGG pathway analysis from model G (glucose supplemented), model T (trehalose supplemented), and model S (saline supplemented) (vessel 3 for each model). Data shown are KEGG pathway assigned reads from four technical replicates for each model. File name: Supplementary Table 3 KEGG pathway.

**Supplementary Table 4.** Fold change ratios of significantly different metabolomic pathways and cell surface components between models G and S versus model T. The individual metabolomic pathways and cell surface components listed here were used to populate **Figure 6**.

Supplementary material

**Supplementary Figure 1.** Recovery of bacterial populations from vessel 3 of model S, (S), model G, (G) and model T (T). The bacterial populations enumerated were, total obligate anaerobic bacteria (black lines), lactose-fermenting *Enterobacteriaceae* (red lines), *Clostridium* spp. (green lines), *Lactobacillus* spp. (blue lines), and *C. difficile* total counts (indigo lines). Results expressed as mean  $\pm$  SD of three technical replicates. Horizontal blue arrow represents the period of clindamycin dosing to all gut models.

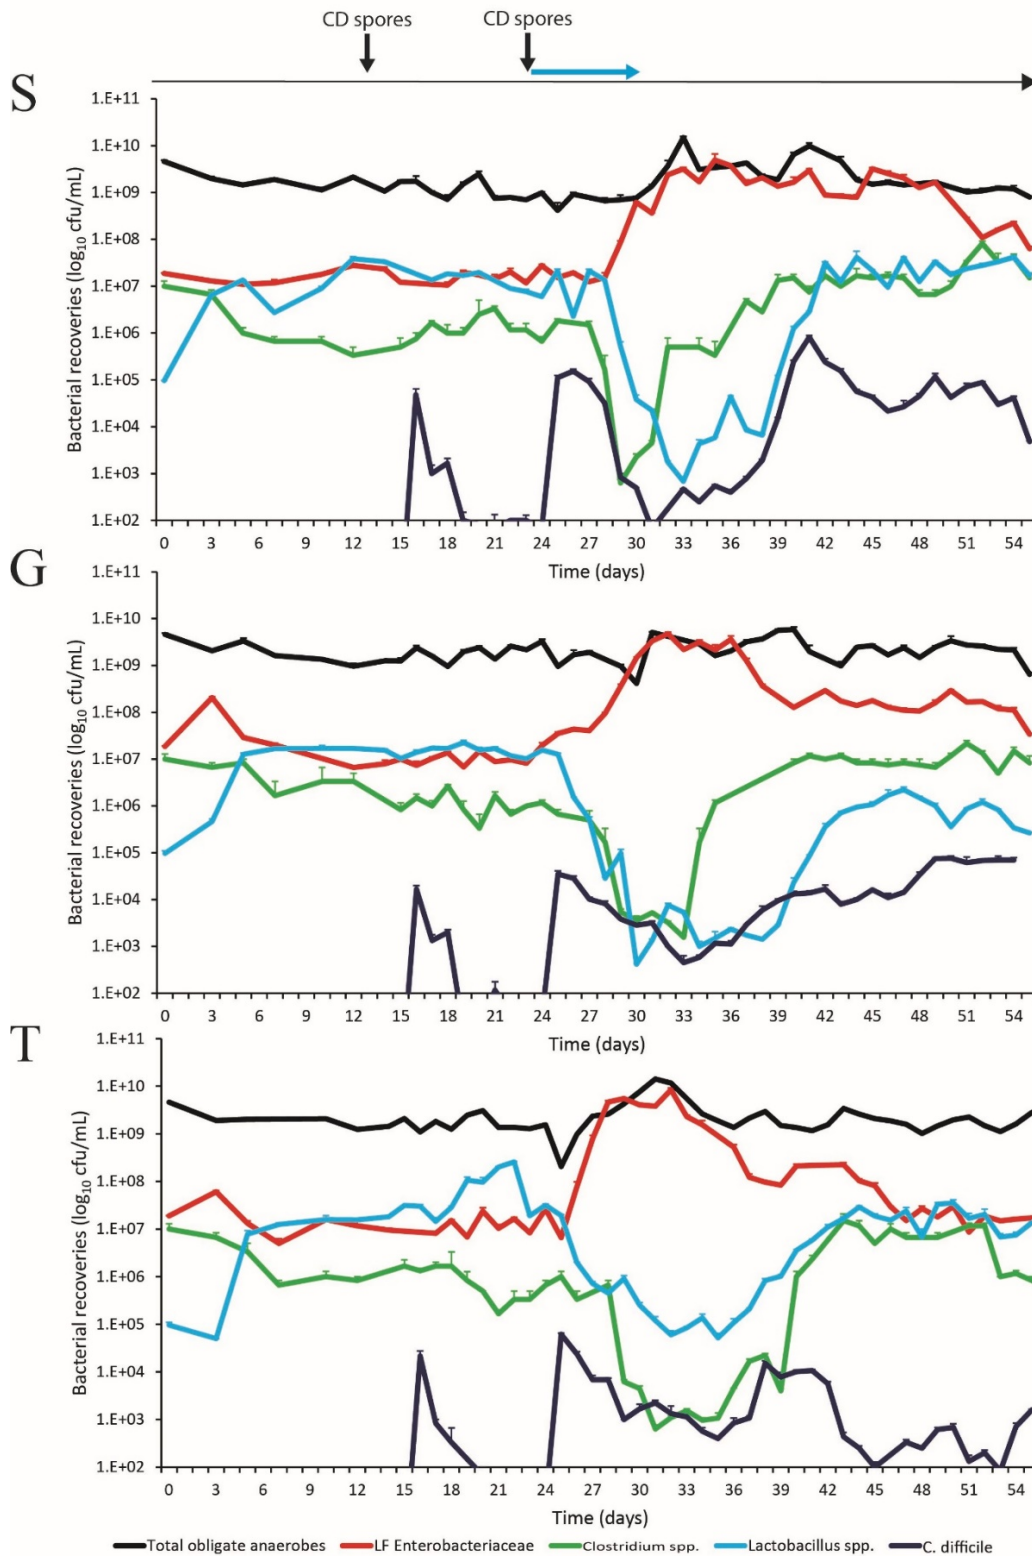



**Supplementary Figure 3.** Putative mechanisms of trehalose-induced protection against *C. difficile* infection.

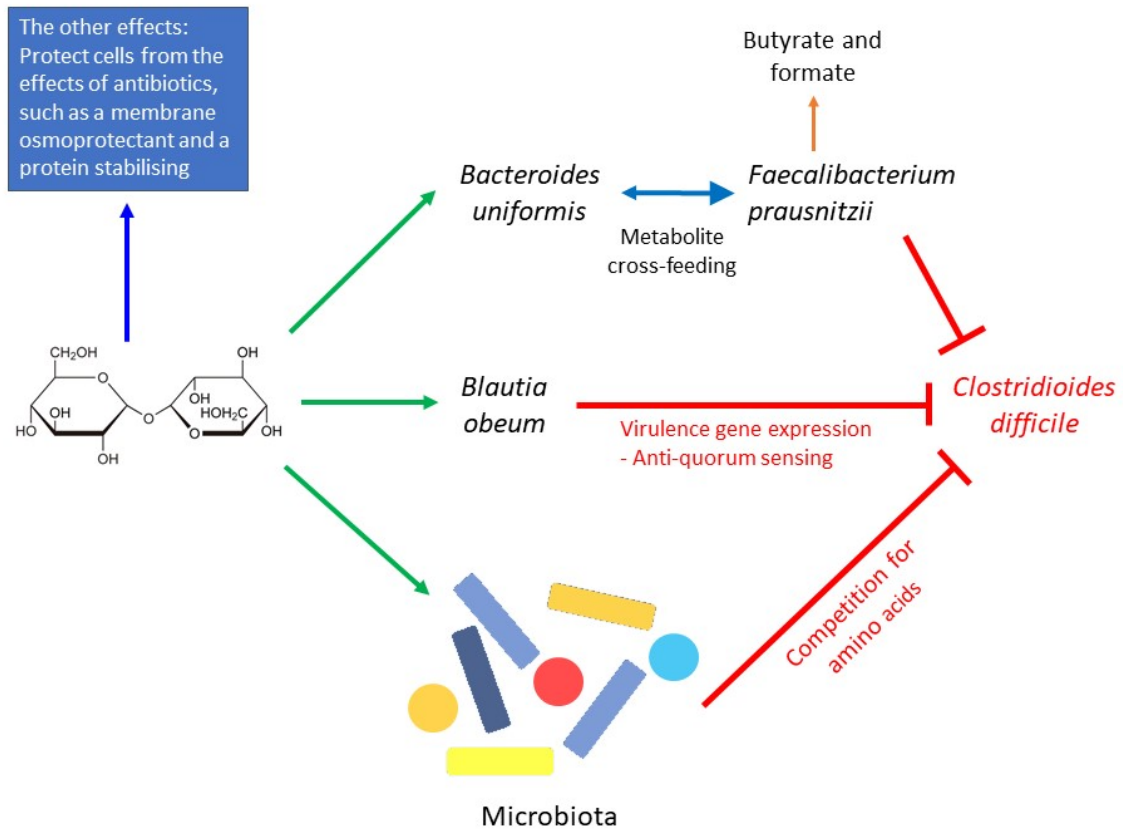

## Supplementary methods

### *Enumeration of endogenous bacteria*

Models were sampled for culture profiling of key intestinal microbiota populations using selective and non-selective agars described in **Supplementary Table 4**. Populations of total bacteria, *Clostridium* spp. lactose-fermenting Enterobacteriaceae, *Enterococcus* spp., *Bacteroides* spp., *Bifidobacterium* spp., *Lactobacillus* spp., *C. difficile* total viable cells and *C. difficile* spores. *C. difficile* spores were isolated by treating 0.5 mL of gut model fluid with 0.5 mL of 96% ethanol. The samples were incubated at room temperature for 1 h, serially diluted to 10<sup>-3</sup> in peptone water, and 20 µL of each sample dilution was plated in triplicate onto supplemented Braziers CCEY agar (**Supplementary Table 3**). Plates were incubated anaerobically for 48 h and distinctive colonies were enumerated and identified based on colony morphology and Matrix-Assisted Laser Desorption Ionization-Time of Flight (MALDI-TOF) identification. Each bacterial population was measured in triplicate (three technical replicates of a single biological replicate) in vessels 2 and 3. The limit of detection for either total viable counts or spores were 1.2 or 1.5, respectively, log<sub>10</sub> cfu/mL.

**Supplementary Table 4.** Target populations and agar composition for bacterial enumeration.

| <b>Target populations</b>                         | <b>Agar</b>                                      | <b>Supplements</b>                                                                                              | <b>Incubation (temp, environment)</b> |
|---------------------------------------------------|--------------------------------------------------|-----------------------------------------------------------------------------------------------------------------|---------------------------------------|
| Total anaerobes and total <i>Clostridium</i> spp. | Fastidious anaerobe agar                         | 5% horse blood                                                                                                  | 37°C, anerobic                        |
| <i>Bifidobacterium</i> spp.                       | 42.5 g/L Columbia agar, and 5 g/L agar technical | 0.5 g/L cysteine HCl, 5 g/L glucose                                                                             | 37°C, anerobic                        |
| <i>Bacteroides</i> spp.                           | Bacteroides bile aesculin agar                   | 5mg/L haemin, 10 µL/L vitamin K, 7.5 mg/L vancomycin, 1 mg/L penicillin, 75 mg/L kanamycin and 10 mg/L colistin | 37°C, anerobic                        |
| <i>Lactobacillus</i> spp.                         | 52.2 g/L MRS broth and 20 g/L agar technical     | 0.5 g/L cysteine hydrochloride, 20 mg/L vancomycin                                                              | 37°C, anerobic                        |
| Total facultative anaerobes                       | Nutrient agar                                    | N/A                                                                                                             | 37°C, aerobic                         |
| Lactose fermenting Enterobacteriaceae             | MaConkey's agar                                  | N/A                                                                                                             | 37°C, aerobic                         |
| <i>Enterococcus</i> spp.                          | <i>Kanamycin aesculin azide agar</i>             | 10 mg/L nalidixic acid, 10 mg/L aztreonam, and 20 mg/L kanamycin                                                | 37°C, aerobic                         |
| Total spores (following alcohol shock for 1 hour) | Fastidious anaerobe agar                         | 5% horse blood                                                                                                  | 37°C, anerobic                        |
| <i>C. difficile</i> total viable cells            | Braziers CCEY agar                               | D-cycloserine (250mg/L) cefoxitin (8mg/L), 5 mg/L lysozyme, and 20 mL/L lysed horse blood                       | 37°C, anerobic                        |
| <i>C. difficile</i> spores                        | Braziers CCEY agar                               | 5 mg/L lysozyme, and 2% lysed horse blood                                                                       | 37°C, anerobic                        |



**Supplementary Table 5.** Ion chromatography conditions used to detect glucose and trehalose

Eluent Buffer

A: Water, B; 300 mM NaOH, C; 300 mM NaOH/1,500 mM sodium acetate

| Time (min) | Flow (ml/min) | A%   | B%   | C%   |
|------------|---------------|------|------|------|
| -10        | 1             | 86.8 | 13.2 | 0.0  |
| 0          | 1             | 86.8 | 13.2 | 0.0  |
| 15         | 1             | 86.8 | 13.2 | 0.0  |
| 25         | 1             | 67.0 | 0.0  | 33.0 |
| 30         | 1             | 67.0 | 0.0  | 33.0 |

} Linear gradient
