# Supplementary material for: Trehalose-Induced Remodelling of the Human Microbiota Affects Clostridioides difficile Infection Outcome in an In Vitro Colonic Model: A Pilot Study
Source: PubMed Central journal article supplement (PMC8284250; doi:10.3389/fcimb.2021.670935), 2021-07-02
Supplement: DataSheet_2.pdf [file DataSheet_2.pdf]

| Experimental period | Day | Trehalose concentration (mM) |        |        |         |        |        |         |        |        | Glucose concentration (mM) |        |        |         |        |        |         |        |        |    |
|---------------------|-----|------------------------------|--------|--------|---------|--------|--------|---------|--------|--------|----------------------------|--------|--------|---------|--------|--------|---------|--------|--------|----|
|                     |     | Model G                      |        |        | Model T |        |        | Model S |        |        | Model G                    |        |        | Model T |        |        | Model S |        |        |    |
|                     |     | V1                           | V2     | V3     | V1      | V2     | V3     | V1      | V2     | V3     | V1                         | V2     | V3     | V1      | V2     | V3     | V1      | V2     | V3     |    |
| CD spore reservoir  | 14  | ND                           | ND     | ND     | 5.2446  | 0.4353 | ND     | ND      | 0.0003 | ND     | 6.98                       | 0.0011 | 0.0021 | 0.0498  | 0.0253 | 0.0007 | 0.001   | 0.0007 | 0.0006 |    |
|                     | 15  | ND                           | ND     | ND     | 8.0957  | ND     | ND     | ND      | ND     | ND     | 16.1177                    | 0.0011 | 0.0017 | 0.0567  | 0.0003 | 0.0019 | 0.0017  | 0.0014 | 0.0066 |    |
|                     | 16  | 0.0128                       | ND     | 0.0004 | 4.1587  | 4.3267 | ND     | ND      | ND     | ND     | 0.1465                     | 0.0067 | 0.0187 | 0.1018  | ND     | ND     | ND      | ND     | ND     |    |
|                     | 17  | 0.0073                       | ND     | 0.0005 | 0.3459  | 0.0006 | ND     | ND      | ND     | 0.0004 | 0.1272                     | 0.0042 | 0.0029 | 0.0185  | 0.0018 | 0.0048 | 0.001   | 0.0009 | 0.0012 |    |
|                     | 18  | ND                           | ND     | ND     | 4.2475  | ND     | ND     | ND      | ND     | ND     | 0.1478                     | 0.0033 | ND     | 0.0839  | 0.0018 | 0.0017 | 0.007   | 0.0021 | 0.0012 |    |
|                     | 19  | ND                           | ND     | ND     | 1.8968  | ND     | ND     | ND      | ND     | ND     | 0.1343                     | 0.0076 | 0.0014 | 0.1077  | 0.0012 | 0.0013 | 0.0009  | 0.0013 | 0.0009 |    |
|                     | 20  | ND                           | ND     | ND     | 0.3459  | ND     | ND     | ND      | ND     | ND     | 0.0189                     | 0.0108 | 0.0051 | ND      | 0.0017 | 0.0024 | 0.0013  | 0.0014 | 0.001  |    |
|                     | 21  | ND                           | ND     | ND     | ND      | ND     | ND     | ND      | ND     | ND     | 0.0147                     | 0.0034 | 0.0017 | ND      | 0.001  | 0.0017 | 0.0015  | 0.0013 | 0.001  |    |
|                     | 22  | ND                           | ND     | ND     | 0.0502  | ND     | ND     | ND      | ND     | ND     | 0.011                      | 0.0015 | 0.0014 | 0.0025  | 0.0015 | 0.0011 | 0.0009  | 0.0014 | 0.0011 |    |
| 23                  | ND  | ND                           | 0.0004 | ND     | ND      | ND     | ND     | ND      | ND     | 0.0009 | ND                         | 0.0235 | 0.0006 | 0.0012  | 0.0007 | 0.0015 | 0.001   | 0.0014 |        |    |
| Clindamycin         | 24  | ND                           | ND     | ND     | 3.6687  | ND     | ND     | ND      | ND     | ND     | 4.0395                     | ND     | 0.005  | 0.03    | 0.0015 | 0.0008 | 0.0014  | 0.0015 | 0.0013 |    |
|                     | 25  | 0.0583                       | ND     | ND     | 11.7116 | 0.8146 | ND     | 0.2221  | ND     | ND     | 28.252                     | 0.3285 | ND     | 0.4015  | 0.0163 | 0.0011 | 1.3918  | 0.0166 | 0.0016 |    |
|                     | 26  | 0.2536                       | 0.007  | ND     | 13.3425 | 6.6753 | 0.9993 | 0.4172  | 0.2168 | 0.021  | 27.8272                    | 2.548  | 0.0147 | 1.6282  | 0.1154 | 0.0395 | 1.8408  | 0.5932 | 0.1239 |    |
|                     | 27  | 0.1788                       | ND     | ND     | 8.2611  | 5.8113 | 2.5191 | ND      | ND     | ND     | 20.1018                    | 0.0954 | 0.0141 | 0.0552  | 0.1604 | 0.2399 | 0.0065  | 0.0027 | 0.0015 |    |
|                     | 28  | 0.0091                       | 0.0127 | ND     | 2.0596  | ND     | ND     | ND      | ND     | ND     | 11.3207                    | 0.0092 | 0.0051 | 0.059   | 0.0075 | 0.0024 | 0.0019  | 0.0013 | 0.001  |    |
|                     | 29  | 0.0048                       | ND     | ND     | 2.8235  | ND     | ND     | ND      | ND     | ND     | 8.9286                     | 0.0046 | 0.008  | 0.1393  | 0.0042 | 0.0026 | 0.0013  | ND     | ND     |    |
|                     | 30  | ND                           | ND     | ND     | ND      | ND     | ND     | ND      | ND     | ND     | ND                         | ND     | ND     | 0.0016  | 0.0008 | 0.0009 | 0.0012  | 0.0047 | 0.0038 |    |
| 31                  | ND  | ND                           | ND     | 2.054  | ND      | ND     | ND     | ND      | ND     | 6.7163 | 0.0032                     | 0.001  | 0.1317 | 0.0016  | 0.0015 | 0.0049 | ND      | ND     |        |    |
| Simulated CDI       | 32  | ND                           | ND     | ND     | 0.2552  | ND     | ND     | ND      | ND     | ND     | 6.1944                     | 0.0022 | 0.0007 | 0.1165  | 0.0049 | 0.0019 | 0.0051  | ND     | ND     |    |
|                     | 33  | ND                           | ND     | ND     | ND      | ND     | ND     | ND      | ND     | ND     | 0.0014                     | 0.0021 | 0.0009 | 0.0046  | 0.002  | 0.0012 | 0.0078  | 0.0008 | ND     |    |
|                     | 34  | ND                           | ND     | ND     | 1.1969  | ND     | ND     | ND      | ND     | ND     | 7.0011                     | 0.0021 | 0.001  | 0.2422  | 0.0042 | 0.0014 | 0.0053  | 0.0012 | ND     |    |
|                     | 35  | ND                           | ND     | ND     | ND      | ND     | ND     | ND      | ND     | ND     | 0.0008                     | 0.0137 | 0.0033 | ND      | 0.0145 | ND     | 0.0046  | ND     | ND     |    |
|                     | 36  | ND                           | ND     | ND     | 0.0112  | ND     | ND     | ND      | ND     | ND     | 2.6103                     | 0.0334 | 0.0168 | 0.0843  | 0.0652 | 0.0018 | 0.1078  | 0.001  | ND     |    |
|                     | 37  | ND                           | ND     | ND     | ND      | ND     | ND     | ND      | ND     | ND     | 0.0009                     | 0.0445 | 0.0116 | 0.0006  | 0.0129 | 0.0312 | ND      | 0.001  | ND     |    |
|                     | 38  | ND                           | ND     | ND     | ND      | ND     | ND     | ND      | ND     | ND     | 0.0017                     | 0.0023 | 0.0013 | 0.001   | 0.0025 | 0.0009 | 0.0077  | 0.0018 | 0.0019 |    |
|                     | 39  | ND                           | ND     | ND     | 0.5673  | ND     | ND     | ND      | ND     | ND     | 2.2232                     | ND     | 0.0009 | 0.6585  | 0.0007 | 0.0006 | 0.0089  | 0.0008 | 0.0009 |    |
|                     | 40  | ND                           | ND     | ND     | 2.1222  | ND     | ND     | ND      | ND     | ND     | 6.8236                     | 0.0019 | 0.0019 | 1.4805  | ND     | ND     | 0.0032  | 0.0011 | 0.0009 |    |
|                     | 41  | ND                           | ND     | ND     | 1.2728  | ND     | ND     | ND      | ND     | ND     | 0.0031                     | 0.0058 | ND     | 0.0011  | 1.6883 | 0.0009 | 0.0081  | 0.0011 | 0.0018 |    |
|                     | 42  | ND                           | ND     | ND     | 2.2694  | ND     | ND     | ND      | ND     | ND     | 0.0026                     | 0.0058 | 0.0007 | 1.0114  | 0.0012 | 0.0019 | 0.0081  | 0.0009 | 0.0012 |    |
|                     | 43  | ND                           | ND     | ND     | ND      | ND     | ND     | ND      | ND     | ND     | 0.0065                     | 0.0156 | 0.0022 | 0.0016  | 0.0011 | 0.0016 | 0.0035  | 0.0009 | 0.001  |    |
|                     | 44  | ND                           | ND     | ND     | 4.6967  | ND     | ND     | ND      | ND     | ND     | 8.447                      | 0.0145 | 0.0031 | 0.5768  | 0.0196 | 0.002  | 0.0044  | 0.001  | 0.0014 |    |
|                     | 45  | ND                           | ND     | ND     | 1.5605  | ND     | ND     | ND      | ND     | ND     | 0.0102                     | 0.0175 | 0.0087 | 0.337   | 0.0016 | 0.0022 | 0.0016  | 0.0013 | 0.0014 |    |
|                     | 46  | ND                           | ND     | ND     | ND      | ND     | ND     | ND      | ND     | ND     | 0.0046                     | 0.0099 | 0.0027 | 0.0029  | 0.0126 | 0.0014 | 0.0013  | 0.0008 | 0.0007 |    |
|                     | 47  | ND                           | ND     | ND     | ND      | ND     | ND     | ND      | ND     | ND     | ND                         | ND     | ND     | ND      | ND     | ND     | ND      | ND     | ND     | ND |
|                     | 48  | ND                           | ND     | ND     | ND      | ND     | ND     | ND      | ND     | ND     | 0.0022                     | 0.0015 | 0.0013 | 0.0041  | 0.0008 | 0.0015 | 0.0041  | 0.0008 | 0.0015 |    |
| 49                  | ND  | ND                           | ND     | ND     | ND      | ND     | ND     | ND      | ND     | 0.0016 | 0.0013                     | 0.0009 | 0.003  | 0.0011  | 0.001  | 0.0016 | 0.0013  | 0.0014 |        |    |
| 50                  | ND  | ND                           | ND     | ND     | ND      | ND     | ND     | ND      | ND     | 0.0027 | 0.0018                     | 0.0016 | 0.0077 | 0.0009  | 0.0016 | 0.0027 | 0.0018  | 0.0016 |        |    |
