# Supplementary material for: Trehalose-Induced Remodelling of the Human Microbiota Affects Clostridioides difficile Infection Outcome in an In Vitro Colonic Model: A Pilot Study
Source: PubMed Central journal article supplement (PMC8284250; doi:10.3389/fcimb.2021.670935), 2021-07-02
Supplement: DataSheet_4.pdf [file DataSheet_4.pdf]

| Metabolic pathways |             |        | Fold change ratio                                                       |            |          |
|--------------------|-------------|--------|-------------------------------------------------------------------------|------------|----------|
| Function           | KEGG path   | Gene   | Model S vs                                                              | Model G vs |          |
| Galactose          | Galactose   | K00883 | 2-dehydro-3-deoxygalactonokinase [EC:2.7.1.58]                          | 1.587493   | 2.69429  |
|                    |             | K01631 | 2-dehydro-3-deoxyphosphogalactonate aldolase [EC:4.1.2.21]              | 1.678875   | 3.011981 |
|                    |             | K07406 | alpha-galactosidase [EC:3.2.1.22]                                       | 3.734462   | 7.211474 |
|                    |             | K12111 | evolved beta-galactosidase subunit alpha [EC:3.2.1.23]                  | 4.686072   | 7.265716 |
| Lactose to GA-3P   |             | K00917 | tagatose 6-phosphate kinase [EC:2.7.1.144]                              | 2.29208    | 4.381098 |
|                    |             | K01220 | 6-phospho-beta-galactosidase [EC:3.2.1.85]                              | 1.647299   | 2.990219 |
|                    |             | K01635 | tagatose 1,6-diphosphate aldolase [EC:4.1.2.40]                         | 2.458287   | 3.441174 |
|                    |             | K01819 | galactose-6-phosphate isomerase [EC:5.3.1.26]                           | 2.075043   | 3.059144 |
| myo-Inosit         | Inositol ph | K00010 | myo-inositol 2-dehydrogenase / D-chiro-inositol 1-dehydrogenase [EC:1.1 | 4.326005   | 9.006917 |
|                    |             | K01093 | 4-phytase / acid phosphatase [EC:3.1.3.26 3.1.3.2]                      | 3.493064   | 8.044779 |
|                    |             | K03335 | inosose dehydratase [EC:4.2.1.44]                                       | 3.754518   | 8.375601 |
|                    |             | K03337 | 5-deoxy-glucuronate isomerase [EC:5.3.1.30]                             | 4.140919   | 7.86438  |
|                    |             | K03338 | 5-dehydro-2-deoxygluconokinase [EC:2.7.1.92]                            | 3.600228   | 7.57371  |
|                    |             | K06606 | 2-keto-myo-inositol isomerase [EC:5.3.99.11]                            | 3.492312   | 8.38526  |
| Generatinf         | Starch and  | K22230 | scyllo-inositol 2-dehydrogenase (NADP+) [EC:1.1.1.1-]                   | 3.583864   | 2.457945 |
|                    |             | K00690 | sucrose phosphorylase [EC:2.4.1.7]                                      | 5.022313   | 8.257956 |
|                    |             | K00691 | maltose phosphorylase [EC:2.4.1.8]                                      | 3.710037   | 3.83521  |
|                    |             | K01208 | cyclomaltodextrinase / maltogenic alpha-amylase / neopullulanase [EC:3. | 4.283956   | 7.522596 |
|                    |             | K01188 | beta-glucosidase [EC:3.2.1.21]                                          | 7.069215   | 5.285367 |
|                    |             | K01838 | beta-phosphoglucomutase [EC:5.4.2.6]                                    | 4.018841   | 3.325884 |
| Trehalose          | Starch and  | K05350 | beta-glucosidase [EC:3.2.1.21]                                          | 2.54099    | 3.212327 |
|                    |             | K01226 | trehalose-6-phosphate hydrolase [EC:3.2.1.93]                           | -2.39529   | -1.94513 |
|                    |             | K02818 | PTS system, trehalose-specific IIB component [EC:2.7.1.201]             | -2.4115    | -2.04198 |
|                    |             | K05342 | alpha,alpha-trehalose phosphorylase [EC:2.4.1.64]                       | -1.49816   | -1.82375 |
| Chitin to A        | Amino sug   | K16055 | trehalose 6-phosphate synthase/phosphatase [EC:2.4.1.15 3.1.3.12]       | -1.32908   | -4.96915 |
|                    |             | K01183 | chitinase [EC:3.2.1.14]                                                 | 1.983814   | 3.427092 |
|                    |             | K01207 | beta-N-acetylhexosaminidase [EC:3.2.1.52]                               | 2.097189   | 1.553362 |
|                    |             | K01654 | N-acetylneuraminase synthase [EC:2.5.1.56]                              | 3.77916    | 3.705011 |
| Produces S         | Glyoxylate  | K01788 | N-acetylglucosamine-6-phosphate 2-epimerase [EC:5.1.3.9]                | 1.859656   | 3.039027 |
|                    |             | K18675 | N,N'-diacetylchitobiose phosphorylase [EC:2.4.1.280]                    | 5.460405   | 6.790055 |
|                    |             | K18676 | glucosamine kinase [EC:2.7.1.8]                                         | 7.421275   | 5.756097 |
|                    |             | K01846 | methyiaspartate mutase sigma subunit [EC:5.4.99.1]                      | 5.086169   | 12.20496 |
|                    |             | K01848 | methyilmalonyl-CoA mutase, N-terminal domain [EC:5.4.99.2]              | 15.99163   | 20.46842 |
|                    |             | K01849 | methyilmalonyl-CoA mutase, C-terminal domain [EC:5.4.99.2]              | 27.9749    | 33.59269 |
| L-glutamin         | Butanoate   | K04835 | methyiaspartate ammonia-lyase [EC:4.3.1.2]                              | 9.763312   | 27.48151 |
|                    |             | K17865 | 3-hydroxybutyryl-CoA dehydratase [EC:4.2.1.55]                          | 11.19641   | 33.191   |
|                    |             | K19268 | methyiaspartate mutase epsilon subunit [EC:5.4.99.1]                    | 9.766065   | 27.47419 |
|                    |             | K19312 | acetyl-CoA/propionyl-CoA carboxylase carboxyl transferase subunit [EC:6 | 7.910646   | 11.9903  |
|                    |             | K01615 | glutaconyl-CoA decarboxylase subunit alpha [EC:7.2.4.5]                 | -2.69954   | -2.27102 |
|                    |             | K07516 | 3-hydroxyacyl-CoA dehydrogenase [EC:1.1.1.35]                           | -3.99697   | -5.29791 |
| Produces z         | Nitrogen n  | K08318 | 4-hydroxybutyrate dehydrogenase / sulfolactaldehyde 3-reductase [EC:1.1 | -1.64089   | -4.77526 |
|                    |             | K14534 | 4-hydroxybutyryl-CoA dehydratase / vinylacetyl-CoA-Delta-isomerase [EC: | -3.9676    | -2.04285 |
|                    |             | K16871 | 4-aminobutyrate--pyruvate transaminase [EC:2.6.1.96]                    | -5.40541   | -8.51064 |
|                    |             | K00260 | glutamate dehydrogenase [EC:1.4.1.2]                                    | 2.109315   | 3.865464 |
|                    |             | K00261 | glutamate dehydrogenase (NAD(P)+) [EC:1.4.1.3]                          | 3.3961     | 7.304646 |
|                    |             | K00366 | ferredoxin-nitrite reductase [EC:1.7.7.1]                               | 4.062796   | 3.110691 |
| Ethanolam          | Glyceroph   | K01501 | nitrilase [EC:3.5.5.1]                                                  | 1.787174   | 3.67446  |
|                    |             | K01674 | carbonic anhydrase [EC:4.2.1.1]                                         | 3.081896   | 4.025432 |
|                    |             | K00926 | carbamate kinase [EC:2.7.2.2]                                           | 1.617142   | 1.513475 |
|                    |             | K03735 | ethanolamine ammonia-lyase large subunit [EC:4.3.1.7]                   | 1.691808   | 1.47497  |
|                    |             | K03736 | ethanolamine ammonia-lyase small subunit [EC:4.3.1.7]                   | 1.768648   | 1.751357 |
|                    |             | K04019 | ethanolamine utilization protein EutA                                   | 3.544227   | 7.490263 |
| Amino acic         |             | K04023 | ethanolamine transporter                                                | 2.438122   | 3.770232 |
|                    |             | K04024 | ethanolamine utilization protein EutJ                                   | 3.154406   | 4.886354 |
|                    |             | K04025 | ethanolamine utilization protein EutK                                   | 3.239121   | 6.724775 |

|                         |         |                                                                         |          |          |
|-------------------------|---------|-------------------------------------------------------------------------|----------|----------|
|                         | K04026  | ethanolamine utilization protein EutL                                   | 3.206721 | 7.087652 |
|                         | K04027  | ethanolamine utilization protein EutM                                   | 3.47818  | 6.459127 |
|                         | K04028  | ethanolamine utilization protein EutN                                   | 3.542527 | 5.618845 |
|                         | K04029  | ethanolamine utilization protein EutP                                   | 1.789027 | 2.987424 |
|                         | K04030  | ethanolamine utilization protein EutQ                                   | 3.702804 | 6.308611 |
|                         | K04031  | ethanolamine utilization protein EutS                                   | 2.048016 | 3.15954  |
| Arginine tc Arginine ar | K01484  | succinylarginine dihydrolase [EC:3.5.3.23]                              | 1.724344 | 2.022483 |
|                         | K05526  | succinylglutamate desuccinylase [EC:3.5.1.96]                           | 1.807067 | 2.082274 |
|                         | K06447  | succinylglutamic semialdehyde dehydrogenase [EC:1.2.1.71]               | 1.752154 | 1.51799  |
| produces ( Phenylalar   | K01713  | cyclohexadienyl dehydratase [EC:4.2.1.51 4.2.1.91]                      | 1.967308 | 1.546609 |
|                         | K03856  | 3-deoxy-7-phosphoheptulonate synthase [EC:2.5.1.54]                     | 2.607757 | 3.24743  |
|                         | K04517  | prephenate dehydrogenase [EC:1.3.1.12]                                  | 2.962624 | 3.335702 |
|                         | K06209  | chorismate mutase [EC:5.4.99.5]                                         | 2.98206  | 3.165561 |
| D-ribose-1 Phosphon     | K05780  | alpha-D-ribose 1-methylphosphonate 5-triphosphate synthase subunit PhnL | 2.083421 | 2.273532 |
|                         | K06162  | alpha-D-ribose 1-methylphosphonate 5-triphosphate diphosphatase [EC:3.6 | 2.080379 | 1.876615 |
|                         | K06163  | alpha-D-ribose 1-methylphosphonate 5-phosphate C-P lyase [EC:4.7.1.1]   | 1.880595 | 1.536351 |
|                         | K06164  | alpha-D-ribose 1-methylphosphonate 5-triphosphate synthase subunit PhnI | 1.941859 | 1.756228 |
|                         | K06165  | alpha-D-ribose 1-methylphosphonate 5-triphosphate synthase subunit PhnH | 2.025884 | 1.520809 |
|                         | K06166  | alpha-D-ribose 1-methylphosphonate 5-triphosphate synthase subunit PhnG | 1.951639 | 1.631562 |
|                         | K09994  | (aminoalkyl)phosphonate N-acetyltransferase [EC:2.3.1.280]              | 2.948262 | 10.3865  |
| Produces f Purine me    | K07127  | 5-hydroxyisourate hydrolase [EC:3.5.2.17]                               | 1.706728 | 1.595742 |
|                         | K07816  | putative GTP pyrophosphokinase [EC:2.7.6.5]                             | 3.365454 | 3.764947 |
|                         | ko00121 | Secondary bile acid biosynthesis                                        | -2.42767 | -1.50825 |

#### Cell surface components

| Function          | KEGG path   | Gene   | Fold change ratio                                                          |                   |
|-------------------|-------------|--------|----------------------------------------------------------------------------|-------------------|
|                   |             |        | Model S vs                                                                 | Model G vs        |
| Siderophor        | Nonriboso   | K04784 | yersiniabactin nonribosomal peptide synthetase                             | 2.769361 4.963087 |
|                   |             | K04785 | yersiniabactin synthetase, thiazolinyl reductase component                 | 3.409583 7.923863 |
|                   |             | K04786 | yersiniabactin nonribosomal peptide/polyketide synthase                    | 3.37029 7.765072  |
|                   |             | K05374 | yersiniabactin synthetase, thioesterase component                          | 2.834566 6.679182 |
| ABC transp        |             | K19309 | bacitracin transport system ATP-binding protein                            | 9.804384 10.04391 |
|                   |             | K19310 | bacitracin transport system permease protein                               | 11.45523 12.48316 |
| Curli             |             | K04334 | major curlin subunit                                                       | -1.13901 -4.65615 |
|                   |             | K04335 | minor curlin subunit                                                       | -1.91161 -5.54011 |
|                   |             | K04336 | curli production protein                                                   | -1.73176 -4.27524 |
| Secretion s       |             | K04337 | curli production assembly/transport component CsgE                         | -1.53205 -5.22194 |
|                   |             | K04338 | curli production assembly/transport component CsgF                         | -1.71163 -6.69375 |
|                   |             | K06214 | curli production assembly/transport component CsgG                         | -1.86035 -5.50711 |
| Biofilm for       | Biofilm for | K11931 | poly-beta-1,6-N-acetyl-D-glucosamine N-deacetylase [EC:3.5.1.-]            | 3.373616 7.402321 |
|                   |             | K11935 | biofilm PGA synthesis protein PgaA                                         | 3.244679 7.93057  |
|                   |             | K11936 | poly-beta-1,6-N-acetyl-D-glucosamine synthase [EC:2.4.1.-]                 | 3.285213 7.440578 |
|                   |             | K11937 | biofilm PGA synthesis protein PgaD                                         | 2.919934 7.212479 |
| Capsule synthesis |             | K10107 | capsular polysaccharide transport system permease protein                  | -1.7477 -4.90795  |
|                   |             | K09688 | capsular polysaccharide transport system permease protein                  | -1.67487 -6.14188 |
|                   |             | K09689 | capsular polysaccharide transport system ATP-binding protein [EC:7.6.2.12] | -1.59517 -16.4309 |
| Structural        |             | K07265 | capsular polysaccharide export protein                                     | -1.80732 -7.8585  |
|                   |             | K07266 | capsular polysaccharide export protein                                     | -1.59474 -8.76681 |
| ABC transp        |             | K02006 | cobalt/nickel transport system ATP-binding protein                         | 1.7052 2.473879   |
|                   |             | K02007 | cobalt/nickel transport system permease protein                            | 1.894377 2.40947  |
|                   |             | K02008 | cobalt/nickel transport system permease protein                            | 1.833957 2.414102 |
|                   |             | K05813 | sn-glycerol 3-phosphate transport system substrate-binding protein         | 1.820151 2.679094 |
|                   |             | K05814 | sn-glycerol 3-phosphate transport system permease protein                  | 2.000044 2.94801  |
|                   |             | K05815 | sn-glycerol 3-phosphate transport system permease protein                  | 2.223547 3.286714 |
|                   |             | K05816 | sn-glycerol 3-phosphate transport system ATP-binding protein [EC:7.6.2.10] | 1.658849 2.564327 |
| ABC transp        |             | K09692 | teichoic acid transport system permease protein                            | 3.643198 3.121338 |
|                   |             | K09693 | teichoic acid transport system ATP-binding protein [EC:7.5.2.4]            | 4.911506 4.901749 |

|            |                      |                                                                                            |                                                                               |          |          |
|------------|----------------------|--------------------------------------------------------------------------------------------|-------------------------------------------------------------------------------|----------|----------|
|            | K09970               | general L-amino acid transport system permease protein                                     | -1.56774                                                                      | -2.82623 |          |
|            | K09971               | general L-amino acid transport system permease protein                                     | -1.83207                                                                      | -3.45678 |          |
|            | K09972               | general L-amino acid transport system ATP-binding protein [EC:7.4.2.1]                     | -1.81001                                                                      | -4.23338 |          |
|            | K10117               | raffinose/stachyose/melibiose transport system substrate-binding protein                   | 5.265328                                                                      | 6.250168 |          |
|            | K10118               | raffinose/stachyose/melibiose transport system permease protein                            | 4.708741                                                                      | 5.741947 |          |
|            | K10119               | raffinose/stachyose/melibiose transport system permease protein                            | 4.745545                                                                      | 5.779807 |          |
|            | K10188               | lactose/L-arabinose transport system substrate-binding protein                             | 3.449079                                                                      | 7.095217 |          |
|            | K10189               | lactose/L-arabinose transport system permease protein                                      | 4.024596                                                                      | 9.796145 |          |
|            | K10190               | lactose/L-arabinose transport system permease protein                                      | 3.643447                                                                      | 8.003709 |          |
|            | K10192               | oligogalacturonide transport system substrate-binding protein                              | 4.241823                                                                      | 4.494798 |          |
|            | K10193               | oligogalacturonide transport system permease protein                                       | 5.285135                                                                      | 4.667196 |          |
|            | K10194               | oligogalacturonide transport system permease protein                                       | 5.409529                                                                      | 4.686637 |          |
|            | K10195               | oligogalacturonide transport system ATP-binding protein                                    | 3.387397                                                                      | 6.681372 |          |
|            | K10240               | cellobiose transport system substrate-binding protein                                      | 5.02591                                                                       | 8.870601 |          |
|            | K10241               | cellobiose transport system permease protein                                               | 2.185786                                                                      | 2.883182 |          |
|            | K10242               | cellobiose transport system permease protein                                               | 2.630931                                                                      | 3.858546 |          |
|            | K10439               | ribose transport system substrate-binding protein                                          | 1.571418                                                                      | 1.729503 |          |
|            | K10440               | ribose transport system permease protein                                                   | 1.756013                                                                      | 1.855714 |          |
|            | K10441               | ribose transport system ATP-binding protein [EC:7.5.2.7]                                   | 1.643021                                                                      | 1.459017 |          |
|            | K15580               | oligopeptide transport system substrate-binding protein                                    | 2.165352                                                                      | 2.500601 |          |
|            | K15581               | oligopeptide transport system permease protein                                             | 2.684989                                                                      | 3.261692 |          |
|            | K15582               | oligopeptide transport system permease protein                                             | 2.992395                                                                      | 3.600072 |          |
|            | K15583               | oligopeptide transport system ATP-binding protein                                          | 2.787353                                                                      | 3.125194 |          |
|            | K15770               | arabinogalactan oligomer / maltooligosaccharide transport system substrate-binding protein | 1.935968                                                                      | 2.609366 |          |
|            | K15771               | arabinogalactan oligomer / maltooligosaccharide transport system permease protein          | 2.296824                                                                      | 2.760161 |          |
|            | K15772               | arabinogalactan oligomer / maltooligosaccharide transport system permease protein          | 2.111815                                                                      | 2.648875 |          |
|            | K17318               | putative aldouronate transport system substrate-binding protein                            | 4.39627                                                                       | 6.764396 |          |
|            | K17319               | putative aldouronate transport system permease protein                                     | 4.623048                                                                      | 7.27761  |          |
|            | K17320               | putative aldouronate transport system permease protein                                     | 4.77654                                                                       | 7.445924 |          |
| T4SS       | Bacterial secretion  | K03194                                                                                     | type IV secretion system protein VirB1                                        | 3.260979 | 7.348808 |
|            |                      | K03195                                                                                     | type IV secretion system protein VirB10                                       | 3.620563 | 7.839676 |
|            |                      | K03196                                                                                     | type IV secretion system protein VirB11 [EC:7.4.2.8]                          | 2.903913 | 6.996573 |
|            |                      | K03197                                                                                     | type IV secretion system protein VirB2                                        | 4.03749  | 8.210343 |
|            |                      | K03199                                                                                     | type IV secretion system protein VirB4 [EC:7.4.2.8]                           | 3.320638 | 7.932874 |
|            |                      | K03200                                                                                     | type IV secretion system protein VirB5                                        | 3.365035 | 7.999439 |
|            |                      | K03201                                                                                     | type IV secretion system protein VirB6                                        | 3.347466 | 7.610748 |
|            |                      | K03203                                                                                     | type IV secretion system protein VirB8                                        | 3.525881 | 7.262667 |
|            |                      | K03204                                                                                     | type IV secretion system protein VirB9                                        | 3.159318 | 7.072796 |
|            |                      | K03205                                                                                     | type IV secretion system protein VirD4 [EC:7.4.2.8]                           | 1.859912 | 1.179242 |
| Chemotaxis | Two-component system | K05874                                                                                     | methyl-accepting chemotaxis protein I, serine sensor receptor                 | -1.573   | -16.9844 |
|            |                      | K05875                                                                                     | methyl-accepting chemotaxis protein II, aspartate sensor receptor             | -1.55356 | -22.5789 |
|            |                      | K05876                                                                                     | methyl-accepting chemotaxis protein III, ribose and galactose sensor receptor | -1.56306 | -17.0911 |
|            |                      | K05877                                                                                     | methyl-accepting chemotaxis protein IV, peptide sensor receptor               | -1.40724 | -18.0185 |
|            |                      | K13816                                                                                     | DSF synthase                                                                  | -1.47153 | -16.7727 |
